# Supplementary material for: An LLTO-containing heterogeneous composite electrolyte with a stable interface for solid-state lithium metal batteries
Source: Royal Society of Chemistry journal article supplement (doi:10.1039/d3dt01677c), 2023-01-01
Supplement: d3dt01677c1.pdf [file d3dt01677c1.pdf]

## Supplementary Information

### **LLTO-containing heterogeneous composite electrolyte with a stable interface enabling solid-state lithium metal batteries**

*Jiaying Bi\**<sup>a, b</sup>, *Ling Zhang*<sup>b, c</sup>, *Borong Wu\**<sup>b, c, d</sup>, *Meixia Xiao*<sup>a</sup>, *Lei Wang*<sup>a</sup>, *Zhao Li*<sup>a</sup>

<sup>a</sup> *College of New Energy, Xi'an Shiyou University, Xi'an, 710065, China.*

<sup>b</sup> *Beijing Key Laboratory of Environmental Science and Engineering, School of Materials Science and Engineering, Beijing Institute of Technology, Beijing, 100081, China.*

<sup>c</sup> *Chongqing Innovation Center of Beijing Institute of Technology, Chongqing 401120, China.*

<sup>d</sup> *Beijing Higher Institution Engineering Research Center of Power Battery and Chemical Energy Materials, Beijing Institute of Technology, Beijing 100081, China.*

\* Corresponding authors.

*E-mail addresses:* [jybi@xsyu.edu.cn](mailto:jybi@xsyu.edu.cn) (J.Y. Bi); [wubr@bit.edu.cn](mailto:wubr@bit.edu.cn) (B.R. Wu).

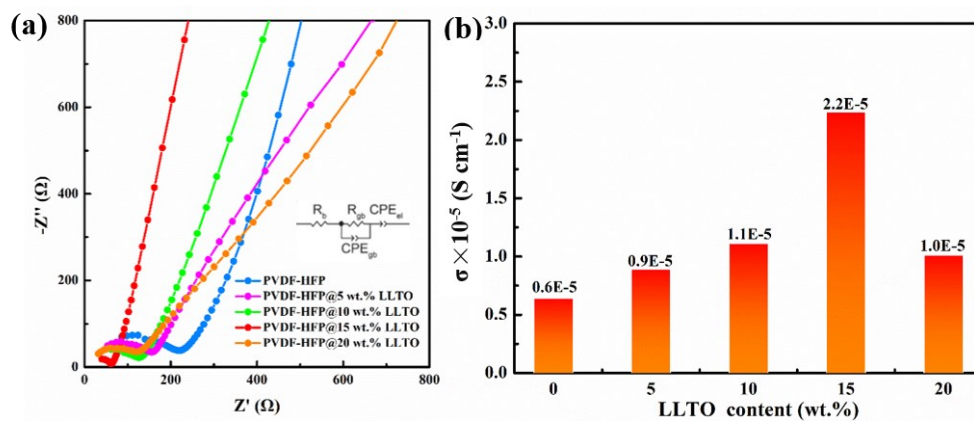

**Fig. S1.** (a) EIS for the PLT electrolytes with different LLTO contents at room temperature. (b) Ionic conductivities of PLT electrolytes with different LLTO contents.

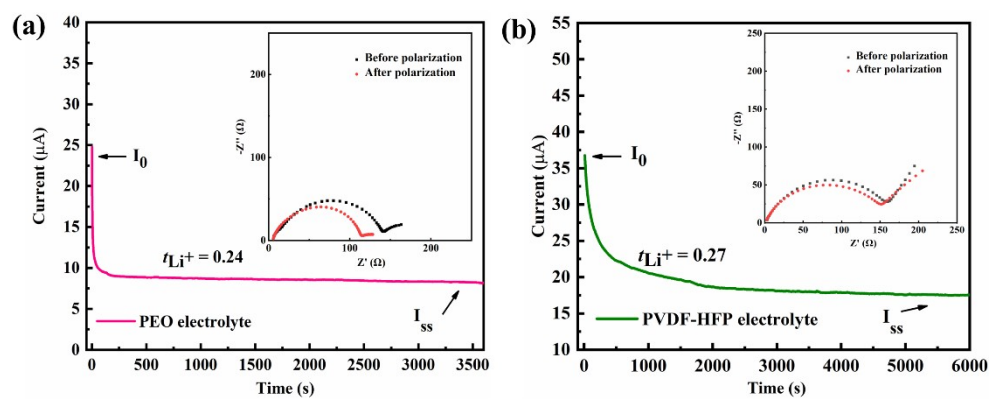

**Fig. S2.** The chronoamperometry curves of the (a) Li|PEO|Li and (b) Li|PVDF-HFP|Li cells under a polarization voltage of 10 mV (Insets are the EIS before and after the polarization).

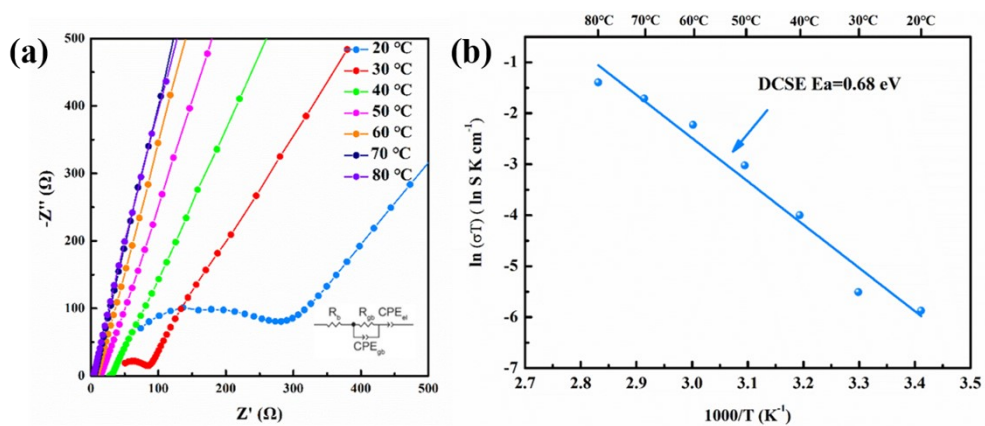

Fig. S3. (a) EIS for the PLTP from 20 to 80 °C. (b) Arrhenius plot of the PLTP.

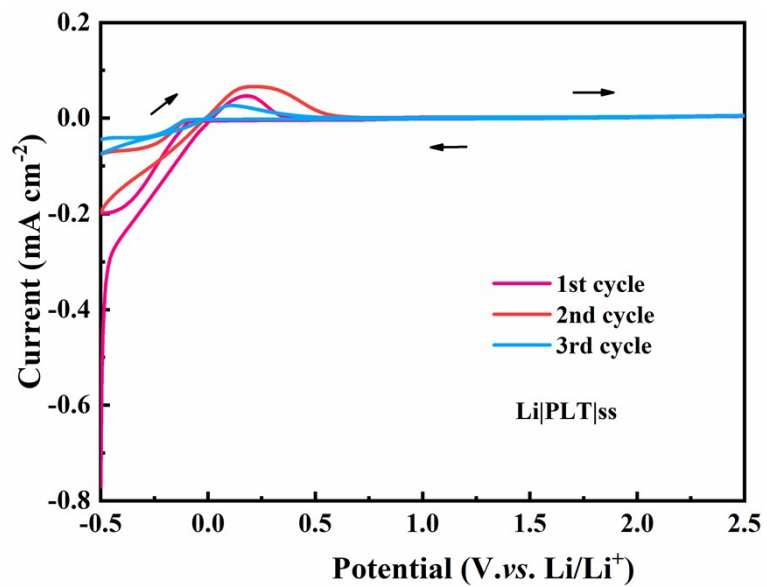

Fig. S4. CV curves of the Li|PLT|ss cell from -0.5 to 2.5 V at 60 °C.

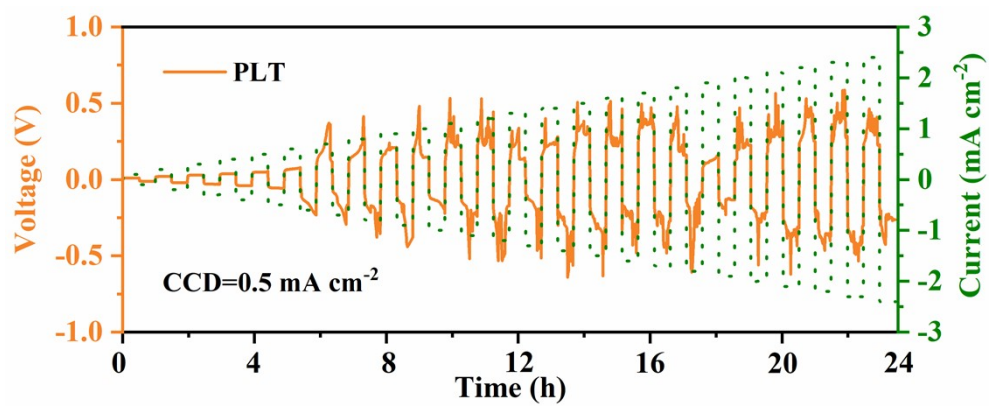

**Fig. S5.** CCD test of the lithium metal symmetrical cell with PLT measured from 0.1 to 2.4 mA cm<sup>-2</sup> at 60 °C.
